# Supplementary material
Source: Springer Nature journal article supplement (https://www.springermedizin.de/resource/supplementary/12968_2011_3259_MOESM5_ESM.pdf/9583630)

**A**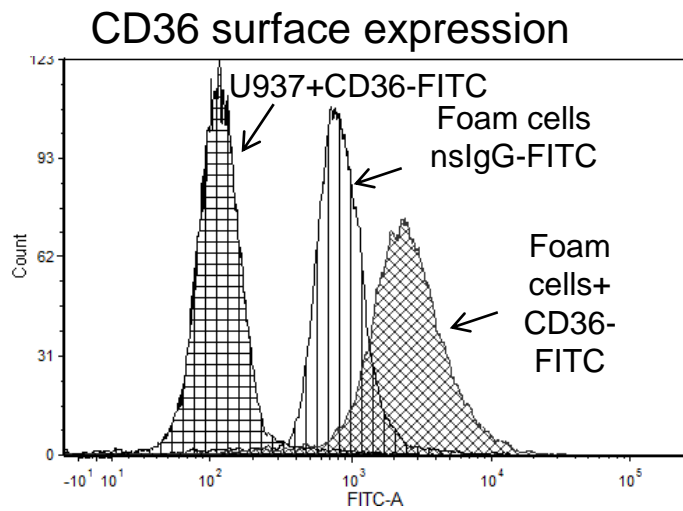**B**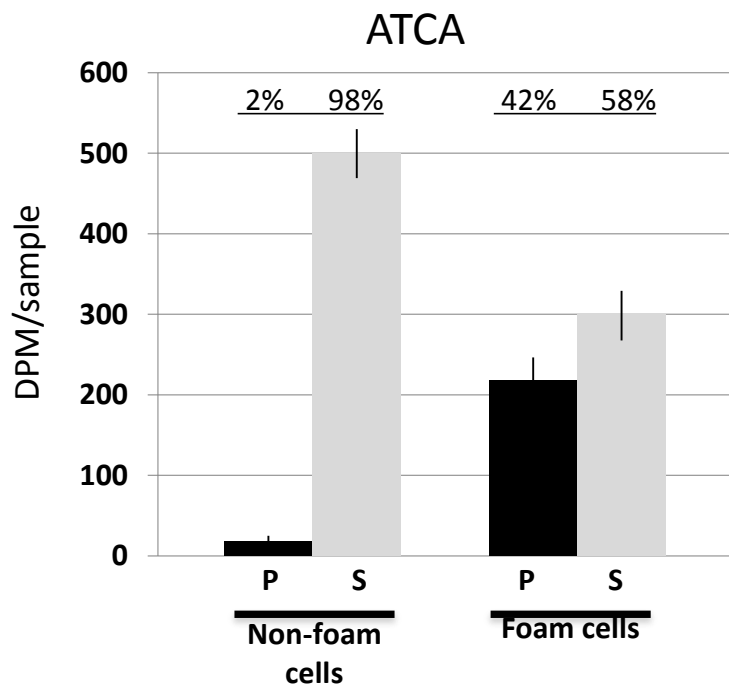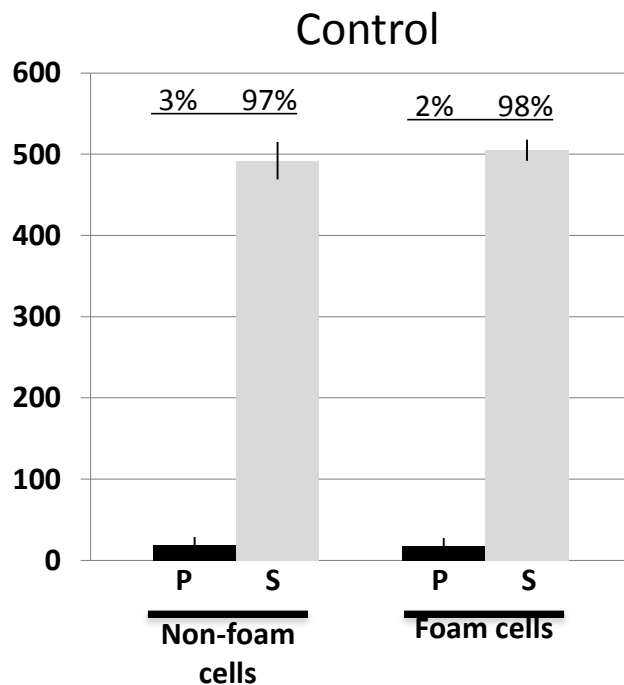

Supplement: MOESM5 [file 9583630]
